# Supplementary material for: Evaluation of Pt Deposition onto Dye-Sensitized NiO Photocathodes for Light-Driven Hydrogen Production
Source: MDPI journal article supplement (doi:10.3390/app12104955), 2022-05-13
Supplement: s1 [file s1]

Archive with 1 entries (1 files):
- applsci-1727213-supplementary.pdf
