# Supplementary material for: Evaluation of Pt Deposition onto Dye-Sensitized NiO Photocathodes for Light-Driven Hydrogen Production
Source: MDPI journal article supplement (doi:10.3390/app12104955), 2022-05-13
Supplement: s1 [file s1 › applsci-1727213-supplementary.pdf]

## Supplementary Materials

### **Evaluation of Pt deposition onto dye-sensitized NiO photocathodes for light-driven hydrogen generation**

Federico Droghetti,<sup>1</sup> Elisabetta Benazzi,<sup>1,2</sup> Rita Boaretto,<sup>1</sup> Mirco Natali<sup>1,3,\*</sup>

<sup>1</sup> *Department of Chemical, Pharmaceutical and Agricultural Sciences (DOCPAS), University of Ferrara, Via L. Borsari 46, 44121, Ferrara, Italy.*

<sup>2</sup> *Department of Chemical Sciences, University of Padova, Via F. Marzolo 1, 35131, Padova, Italy.*

<sup>3</sup> *Centro Interuniversitario per la Conversione Chimica dell'Energia Solare (SolarChem), sez. di Ferrara, Via L. Borsari 46, 44121, Ferrara, Italy.*

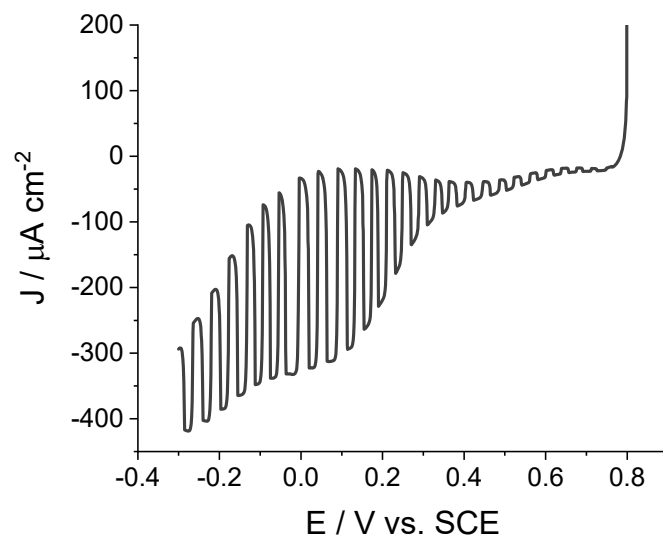

**Figure S1.** LSV of sensitized NiO electrode of type A in N<sub>2</sub>-purged 0.1 M acetate buffer at pH 4 in the presence of 0.01 M [Co(NH<sub>3</sub>)<sub>5</sub>Cl]Cl<sub>2</sub> as an irreversible electron acceptor.

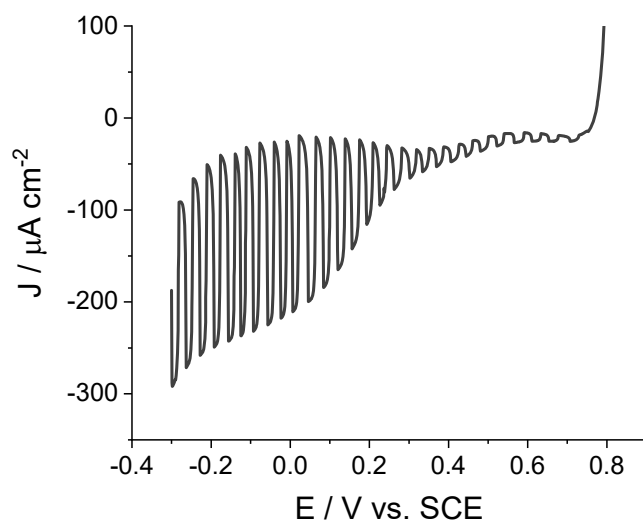

**Figure S2.** LSV of sensitized NiO electrode of type B in N<sub>2</sub>-purged 0.1 M acetate buffer at pH 4 in the presence of 0.01 M [Co(NH<sub>3</sub>)<sub>5</sub>Cl]Cl<sub>2</sub> as an irreversible electron acceptor.

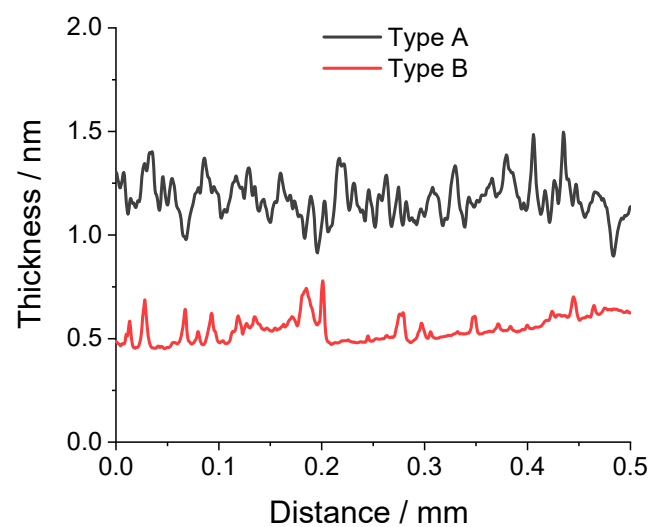

**Figure S3.** Film thickness of NiO electrodes of type A and type B measured using profilometry.

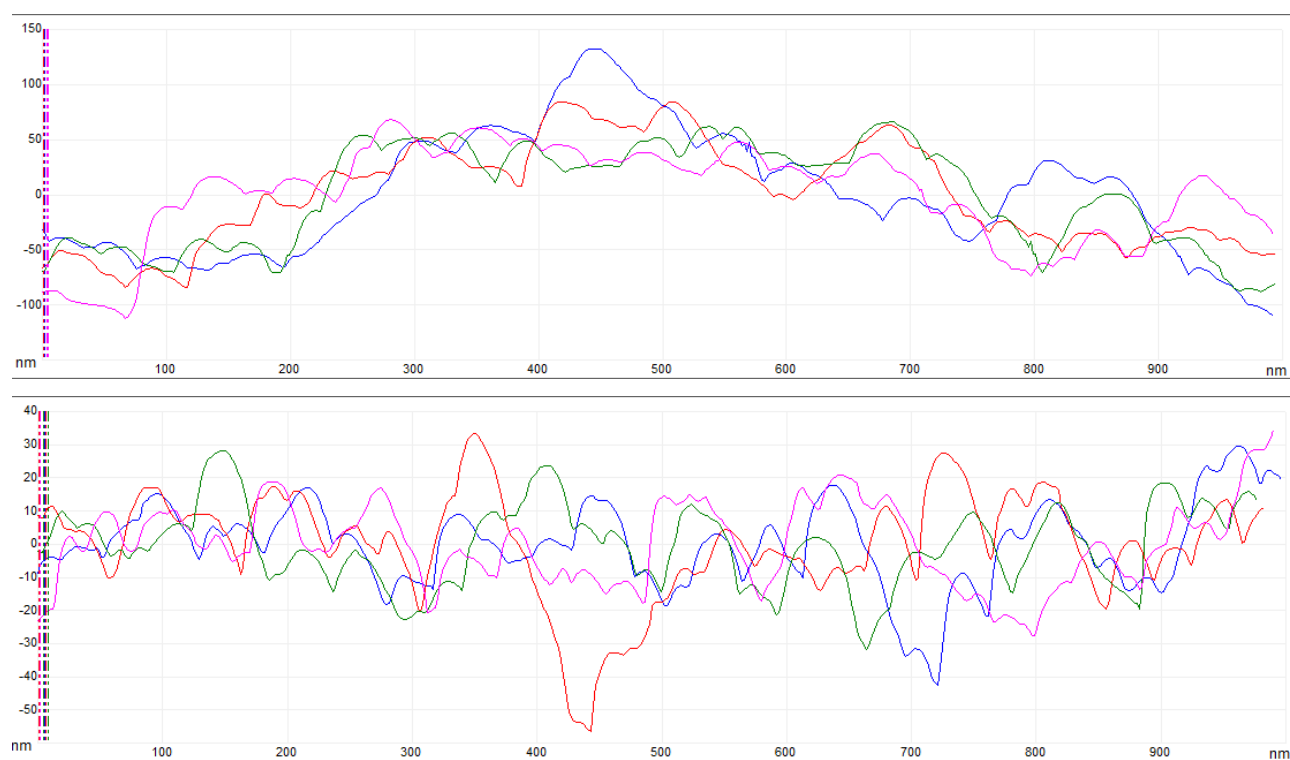

**Figure S4.** Section analyses of NiO electrodes of type A (top) and type B (bottom) measured using AFM.

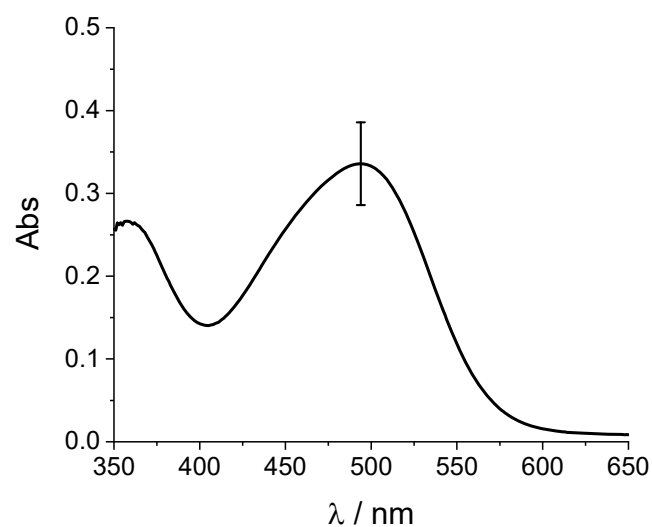

**Figure S5.** Absorption spectrum of a solution (optical pathlength of 1 cm) obtained after desorption of a sensitized NiO electrode of type A (average of three samples, surface area of 1.5 cm<sup>2</sup>) with 20  $\mu$  L TBAOH 1 M in methanol and further dilution with methanol to a total volume of 3 mL.

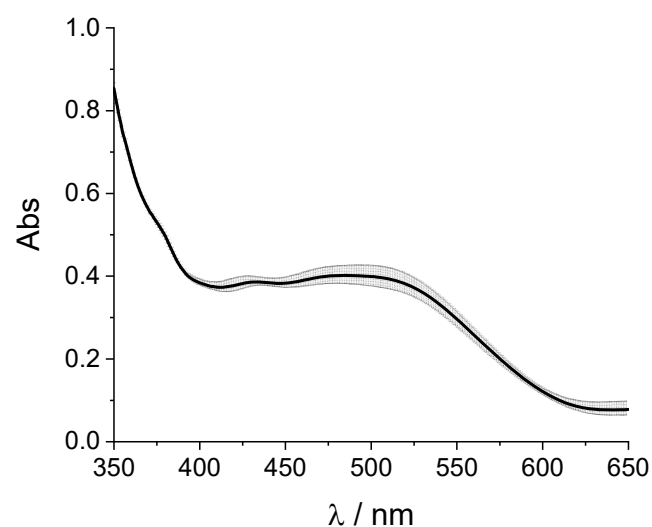

**Figure S6.** Absorption spectrum (average of three samples) of a NiO electrode of type B sensitized after overnight soaking in a 0.5 mM acetonitrile solution of the **P1** dye.

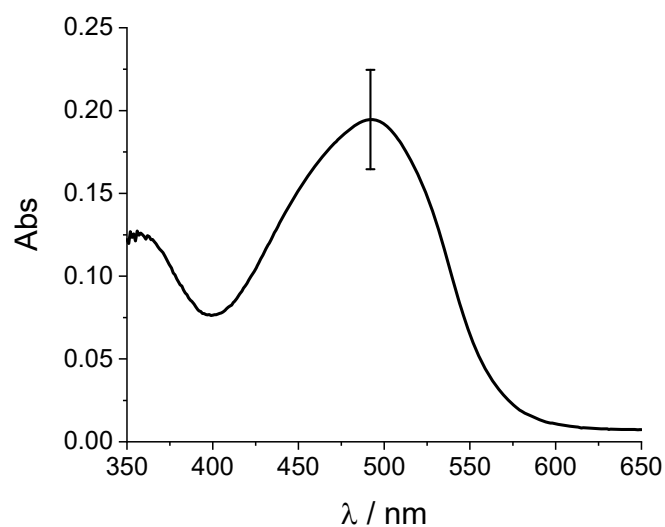

**Figure S7.** Absorption spectrum of a solution (optical pathlength of 1 cm) obtained after desorption of a sensitized NiO electrode of type B (average of three samples, surface area of  $1.5 \text{ cm}^2$ ) with  $20 \text{ }\mu\text{L}$  TBAOH 1 M in methanol and further dilution with methanol to a total volume of 3 mL.

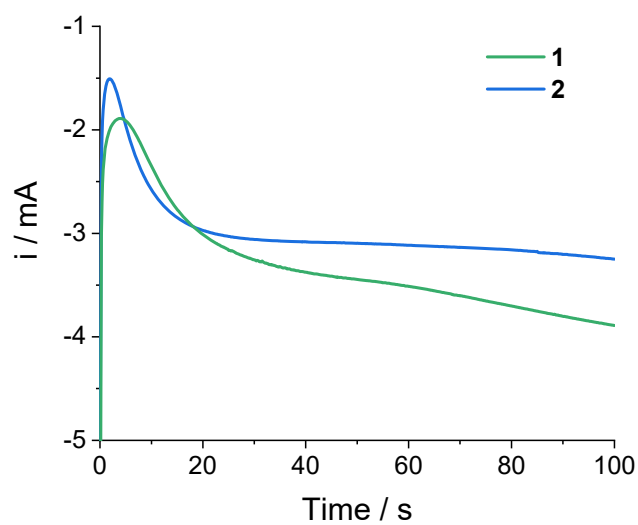

**Figure S8.** Exemplars of current vs. time trace recorded during the deposition with Method 1 of sensitized NiO electrodes of type A.

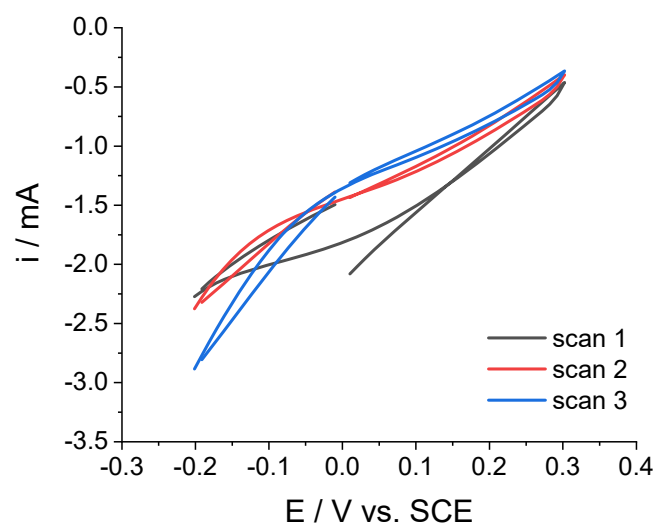

**Figure S9.** Exemplar of current vs. voltage traces recorded during the deposition with Method 3 of sensitized NiO electrodes of type A.

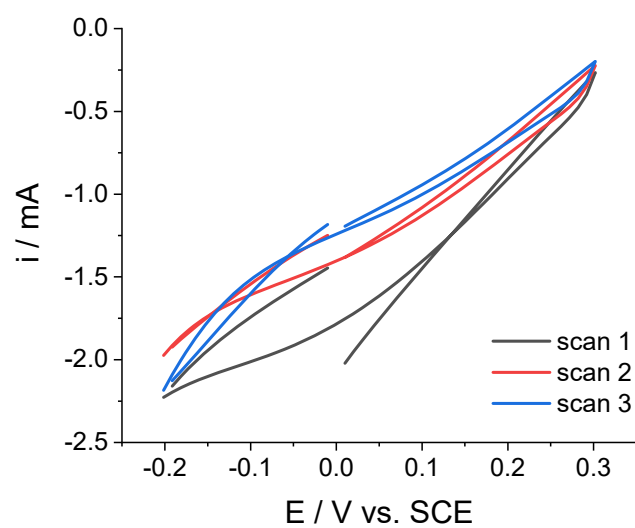

**Figure S10.** Exemplar of current vs. voltage traces recorded during the deposition with Method 4 of sensitized NiO electrodes of type A.

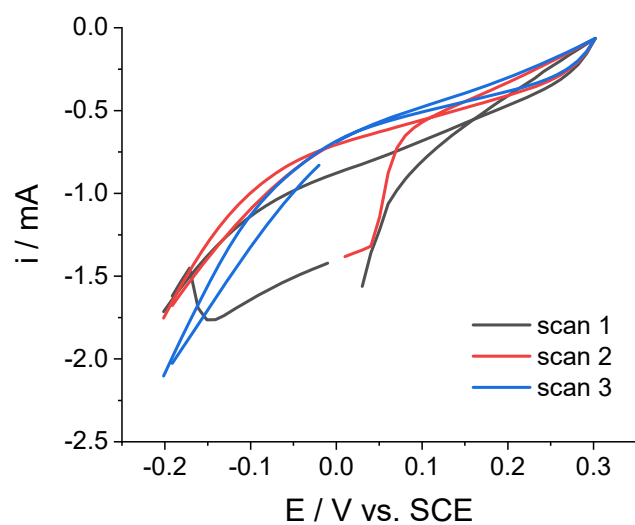

**Figure S11.** Exemplar of current vs. voltage traces recorded during the deposition with Method 5 of sensitized NiO electrodes of type A.

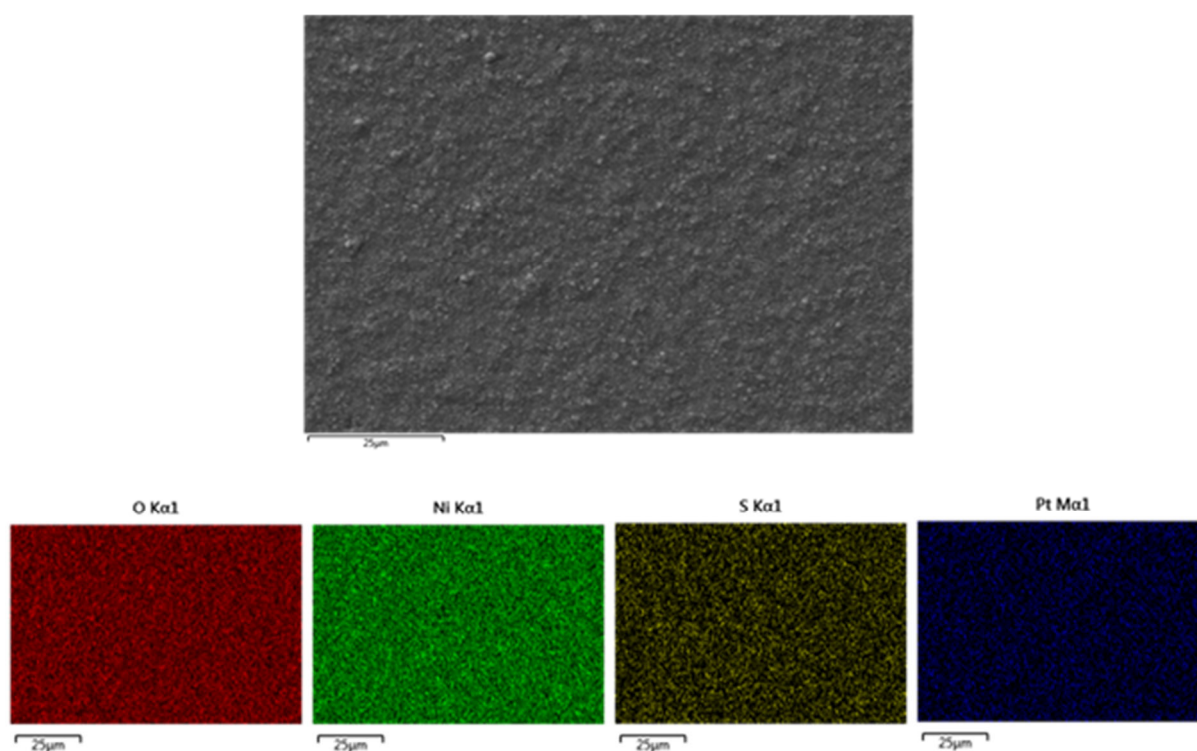

**Figure S12.** SEM/EDS analysis of NiO electrodes of type A prepared using Method 2 at 20 s.

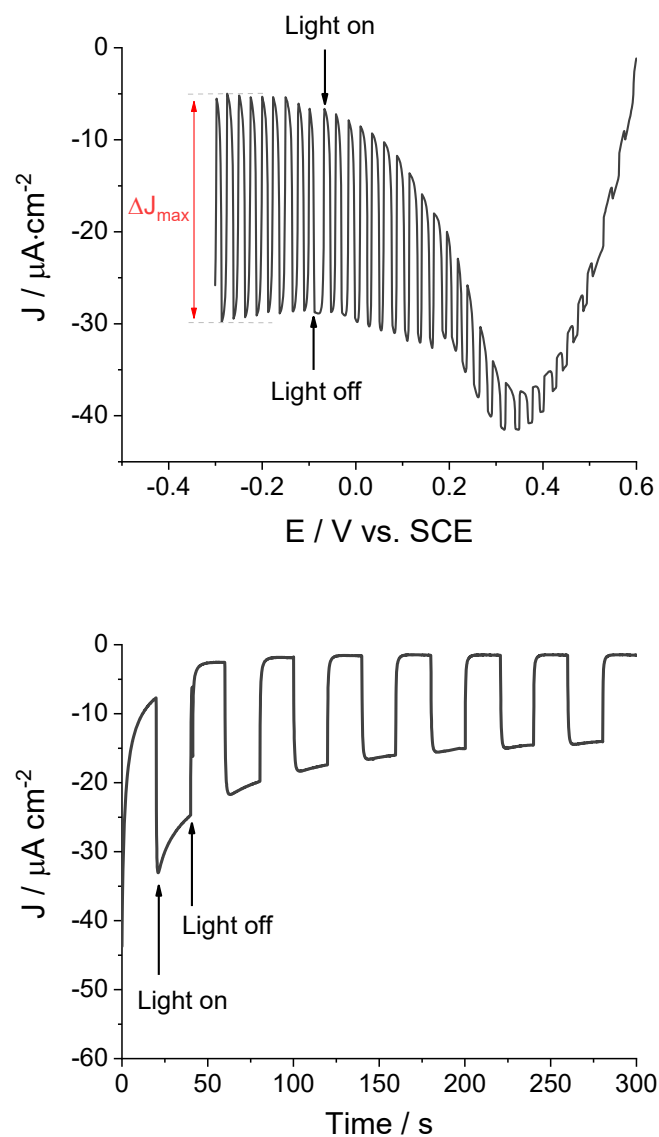

**Figure S13.** Representative LSV (top) and CA (bottom) of NiO-A|**P1**|Pt-**1** at 20 s in  $\text{N}_2$ -purged 0.1 M acetate buffer at pH 4 under chopped irradiation to highlight on-off light cycles and the procedure to estimate the maximum photocurrent density ( $\Delta J_{\text{max}}$ ).

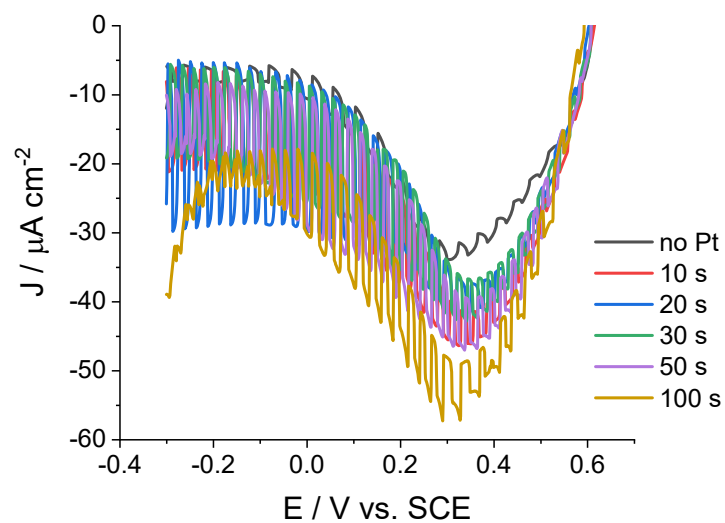

**Figure S14.** LSV of NiO-A|**P1**|Pt-**1** at different deposition times in N<sub>2</sub>-purged 0.1 M acetate buffer at pH 4 under chopped irradiation.

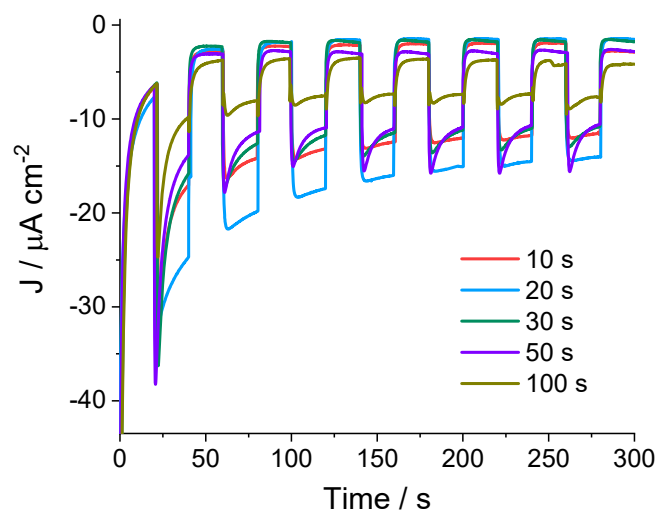

**Figure S15.** CA at -0.2 V vs. SCE of NiO-A|**P1**|Pt-**1** at different deposition times in N<sub>2</sub>-purged 0.1 M acetate buffer at pH 4 under chopped irradiation.

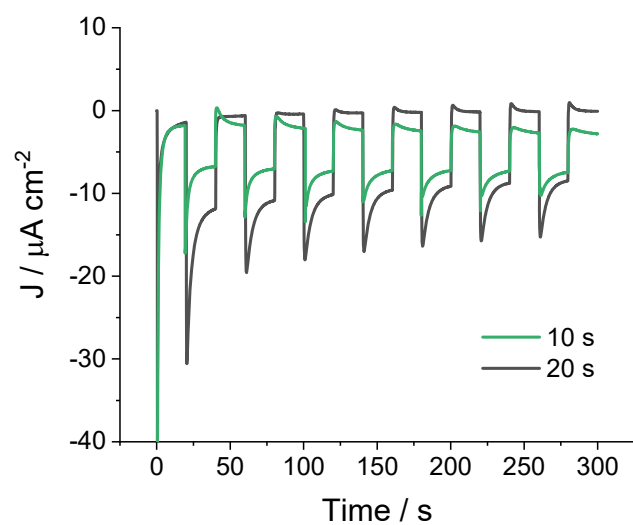

**Figure S16.** CA at  $-0.2$  V vs. SCE of NiO-A|**P1**|Pt-2 at different deposition times in  $N_2$ -purged 0.1 M acetate buffer at pH 4 under chopped irradiation.

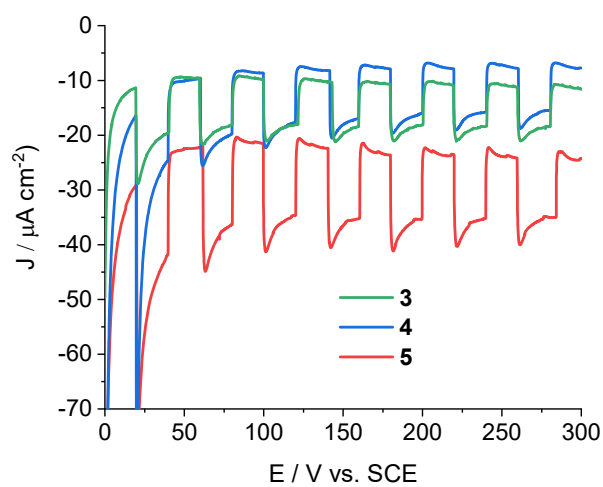

**Figure S17.** CA at  $-0.2$  V vs. SCE of NiO-A|**P1**|Pt- $n$  with  $n = 3-5$  in  $N_2$ -purged 0.1 M acetate buffer at pH 4 under chopped irradiation.

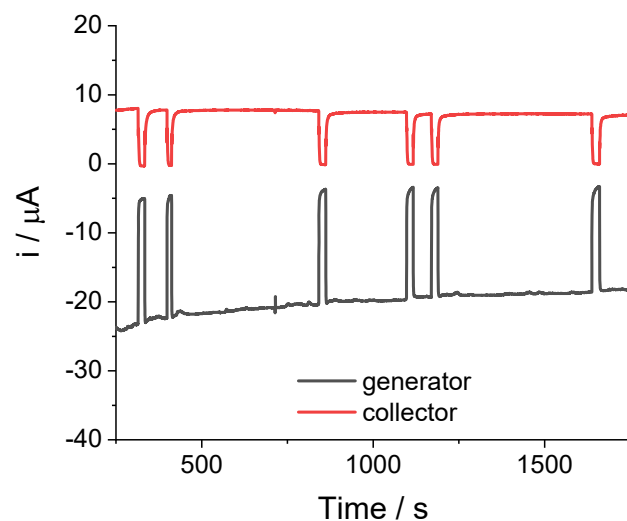

**Figure S18.** Faradaic efficiency determination for NiO-A|**P1**|Pt-**1** at 20 s in N<sub>2</sub>-purged 0.1 M acetate buffer at pH 4 under chopped irradiation: the NiO-based photocathode generator was held at  $-0.2$  V vs. SCE while the Pt-based collector was held at  $+0.2$  V vs. SCE.

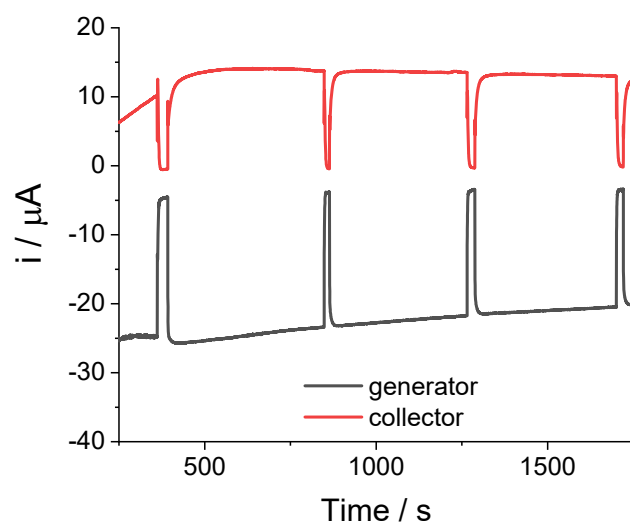

**Figure S19.** Faradaic efficiency determination for NiO-A|**P1**|Pt-**5** in N<sub>2</sub>-purged 0.1 M acetate buffer at pH 4 under chopped irradiation: the NiO-based photocathode generator was held at  $-0.2$  V vs. SCE while the Pt-based collector was held at  $+0.2$  V vs. SCE.

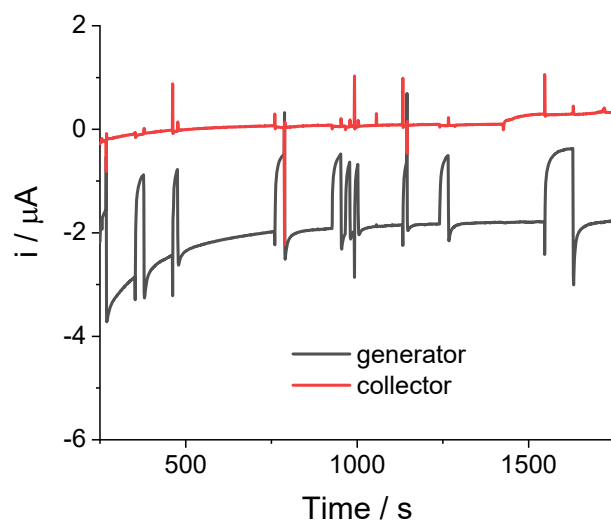

**Figure S20.** Faradaic efficiency determination for the non-platinized NiO electrode of type A in N<sub>2</sub>-purged 0.1 M acetate buffer at pH 4 under chopped irradiation: the NiO-based photocathode generator was held at  $-0.2$  V vs. SCE while the Pt-based collector was held at  $+0.2$  V vs. SCE.

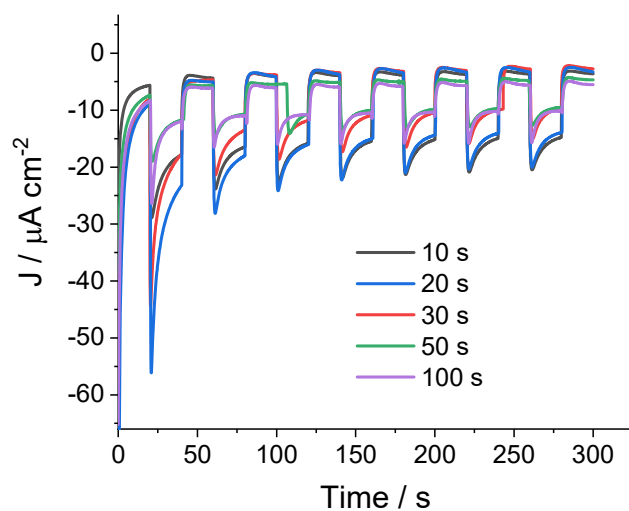

**Figure S21.** CA at  $-0.2$  V vs. SCE of NiO-B|**P1**|Pt-**1** at different deposition times in N<sub>2</sub>-purged 0.1 M acetate buffer at pH 4 under chopped irradiation.

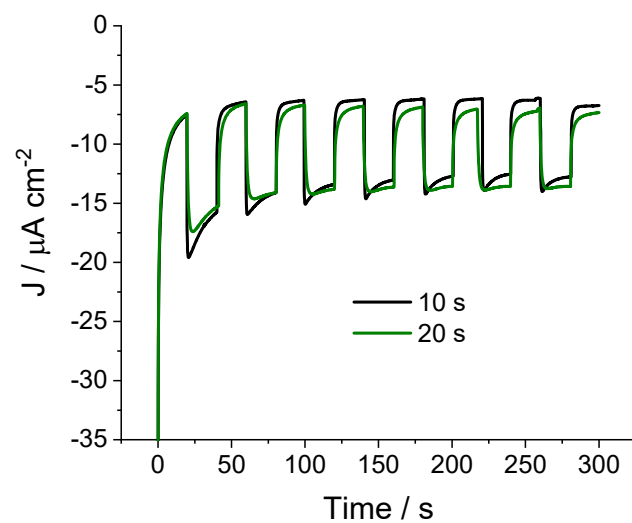

**Figure S22.** CA at  $-0.2$  V vs. SCE of NiO-B|**P1**|Pt-**2** at different deposition times in  $\text{N}_2$ -purged  $0.1$  M acetate buffer at pH 4 under chopped irradiation.

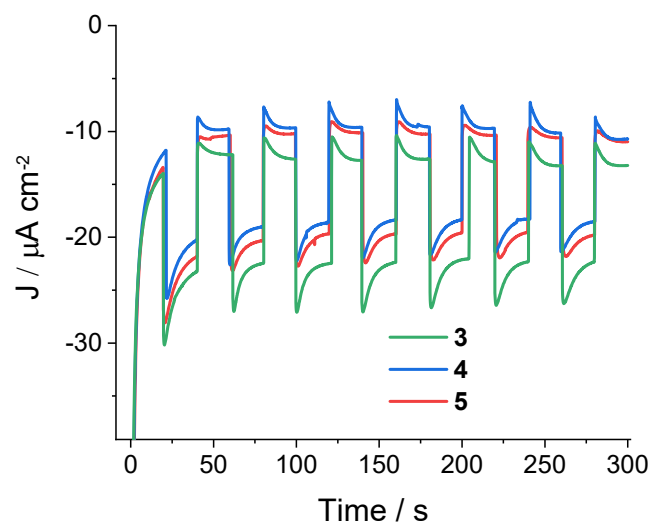

**Figure S23.** CA at  $-0.2$  V vs. SCE of NiO-B|**P1**|Pt-**n** with  $n = 3-5$  in  $\text{N}_2$ -purged  $0.1$  M acetate buffer at pH 4 under chopped irradiation.

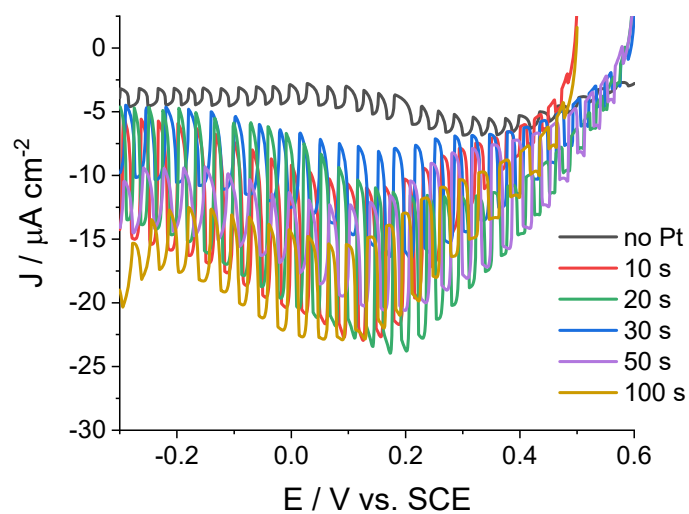

**Figure S24.** LSV of NiO-B[P1]Pt-1 at different deposition times in N<sub>2</sub>-purged 0.1 M acetate buffer at pH 4 under chopped irradiation.

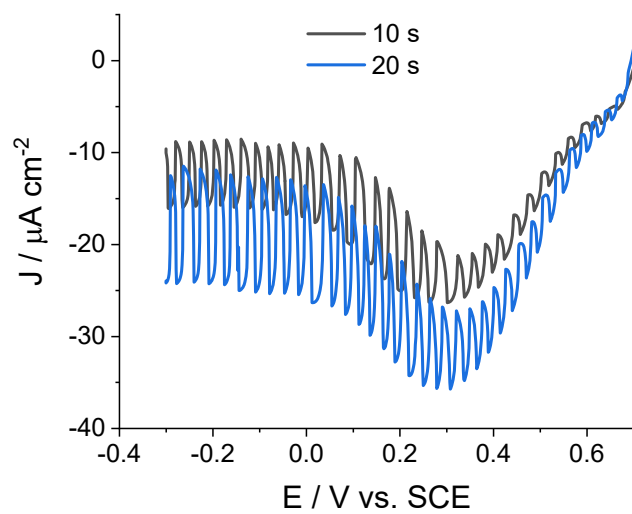

**Figure S25.** LSV of NiO-B[P1]Pt-2 at different deposition times in N<sub>2</sub>-purged 0.1 M acetate buffer at pH 4 under chopped irradiation.
